# Supplementary material for: Urban Green Infrastructure and Sustainable Development: A Review
Source: MDPI journal article supplement (doi:10.3390/su132011498), 2021-10-18
Supplement: s1 [file s1]

## Supplementary Materials:

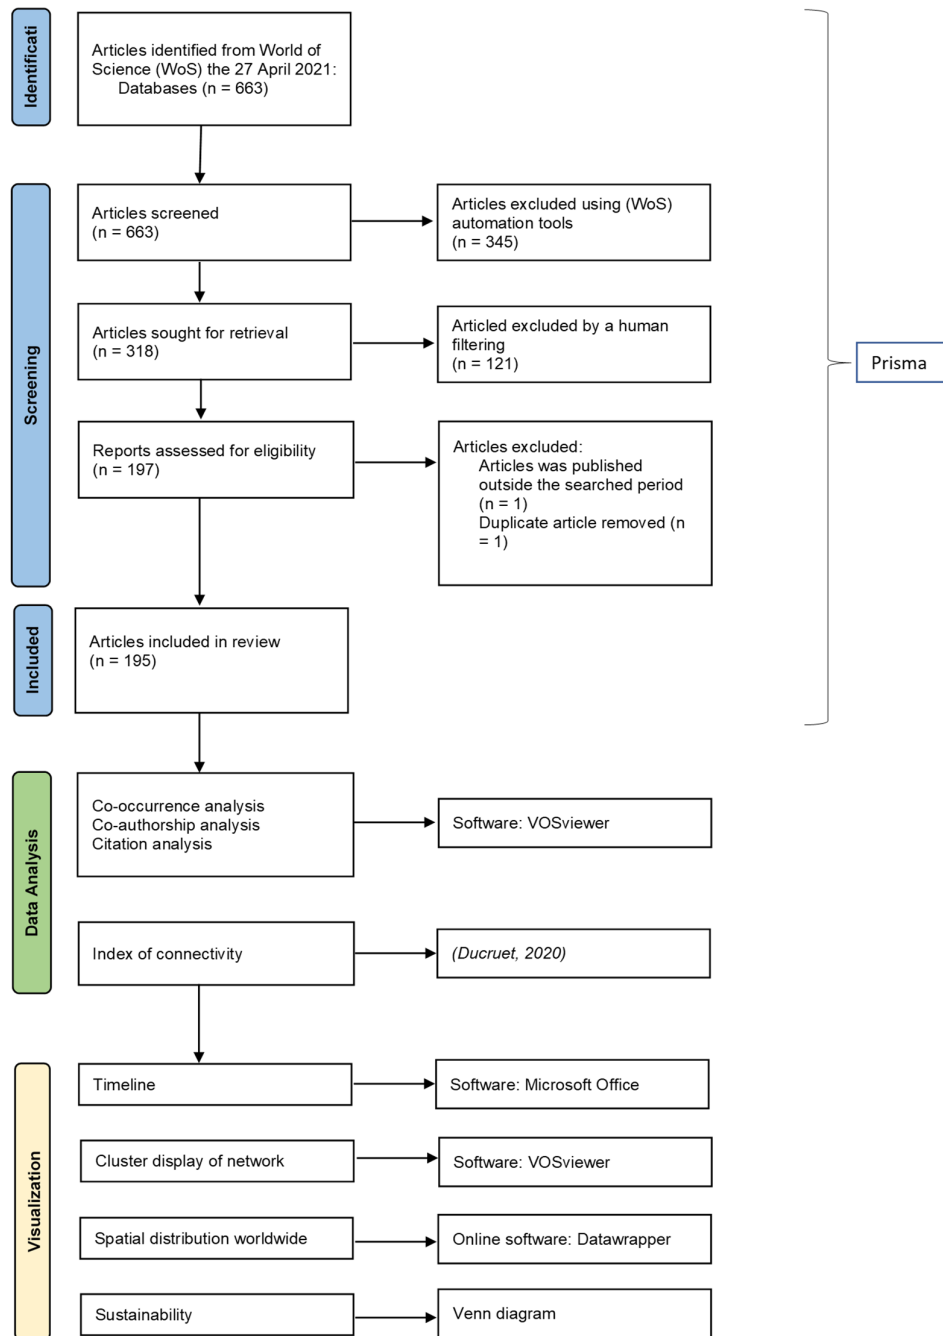

Figure S1: Steps performed for the literature review following the PRISMA model and data analysis and visualization after VOSviewer.

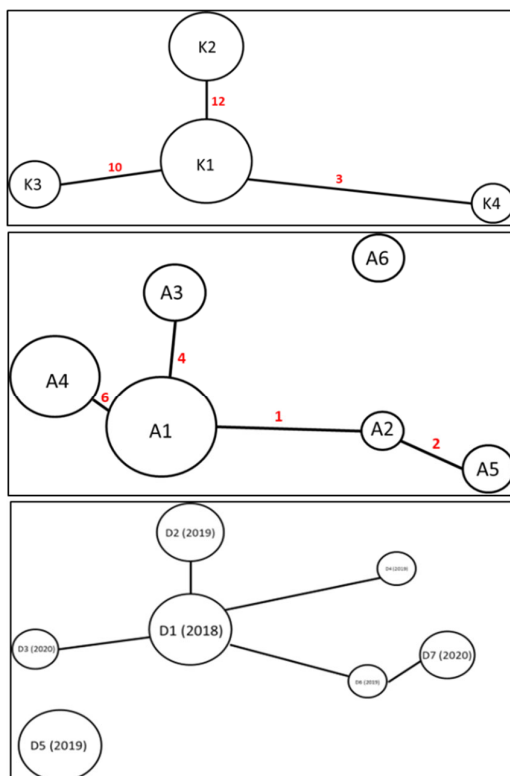

Figure S2. Above: Idealized network of 4 keywords (K) after VOSviewer. The numbers indicate the strength of the links between two keywords (the number of publications in which the two keywords linked occur). Middle: Idealized network of 6 authors (A) after VOSviewer. The numbers indicate the strength of the link between two authors (the number of papers coauthored). Below: Idealized network of citations of documents (D) after VOSviewer (D1 means Document 1).

## NUMBER OF ARTICLES BY COUNTRIES

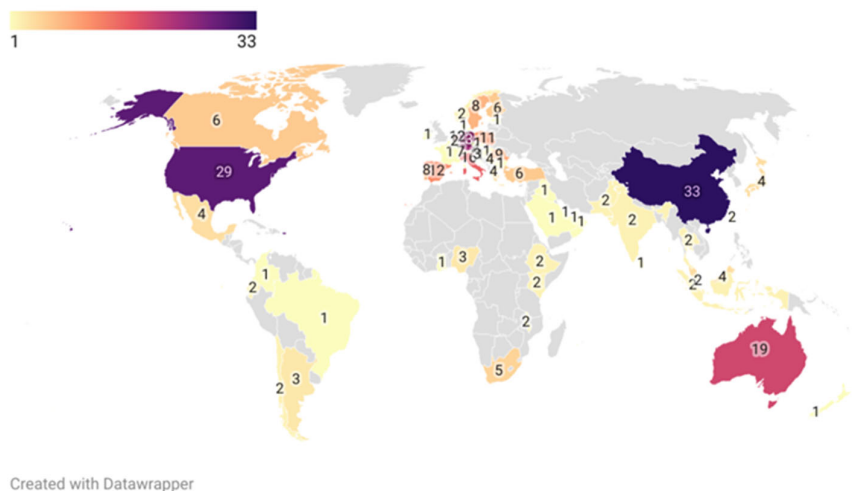

Figure S3: The distribution of the 195 articles per countries

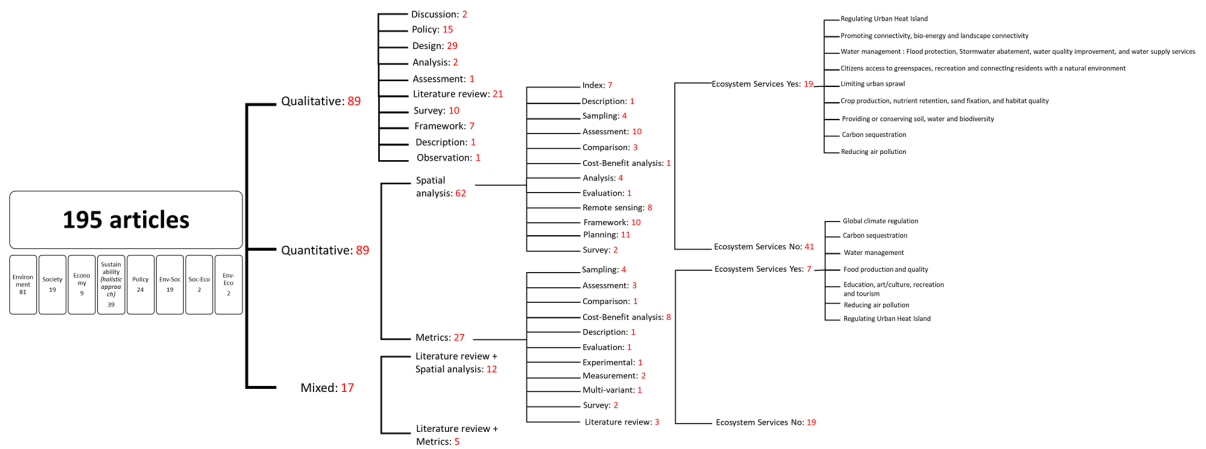

Figure S4: Disentangling the approaches of the 195 articles.

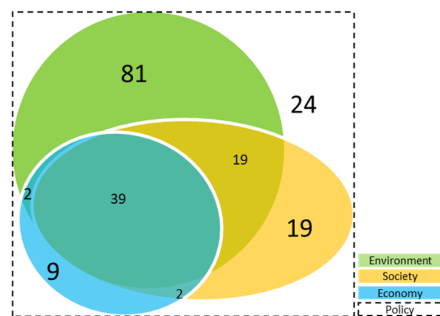

Figure S5: Venn diagram showing the number of documents approaching environmental, social or economic aspects or combinations of these three.

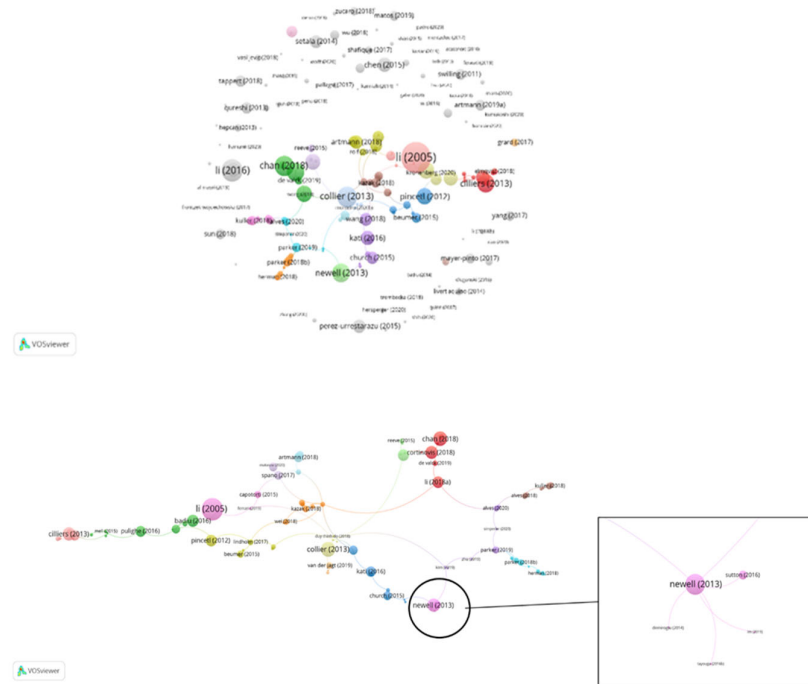

Figure S6: The above figure shows the most-cited article (Li, 2005), indicated by the name of the first author, The below figure is the same figure as the first figure but without the unconnected/unlinked documents, (Newell 2013) is the most cited document by the authors of this research review, and (Li, 2005) is the most cited document by other authors outside this literature review.

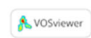

Figure S7: The highest number of articles is represented by one of the green circles, it belongs to Dagmar Haase
